# Supplementary material for: In Cis Effect of DMPK Expanded Alleles in Myotonic Dystrophy Type 1 Patients Carrying Variant Repeats at 5′ and 3′ Ends of the CTG Array
Source: MDPI journal article supplement (doi:10.3390/ijms241210129), 2023-06-14
Supplement: s1 [file s1]

**Table S1.** CpG sites and global methylation (%) both upstream (5' end CpG island) and downstream (3' end CpG island) of the (CTG)<sub>n</sub> expansion in “pure” adult DM1 patients (Pt 21 – Pt 37; n = 17) and congenital DM1 patients (Pt 38 - Pt 40; n = 3).

| ID    | 5' end CpG island    |                   | 3' end CpG island    |                   | Parental origin of mutation |
|-------|----------------------|-------------------|----------------------|-------------------|-----------------------------|
|       | Mean CpG sites Meth% | Mean Global Meth% | Mean CpG sites Meth% | Mean Global Meth% |                             |
| Pt 21 | 4.5                  |                   | 6.8                  |                   | NA                          |
| Pt 22 | 3.3                  |                   | 7.5                  |                   | NA                          |
| Pt 23 | 3.5                  |                   | 18.7                 |                   | Paternal                    |
| Pt 24 | 4.1                  |                   | 10.7                 |                   | Maternal                    |
| Pt 25 | 3.1                  |                   | 15.5                 |                   | Paternal                    |
| Pt 26 | 3.1                  |                   | 7.5                  |                   | NA                          |
| Pt 27 | 3.6                  |                   | 7.0                  |                   | Paternal                    |
| Pt 28 | 3.2                  |                   | 14.5                 |                   | Maternal                    |
| Pt 29 | 4.0                  | 3.8 ± 1.0         | 8.2                  | 13.1 ± 4.9        | Paternal                    |
| Pt 30 | 3.6                  |                   | 16.7                 |                   | Maternal                    |
| Pt 31 | 3.3                  |                   | 18.0                 |                   | NA                          |
| Pt 32 | 3.7                  |                   | 17.0                 |                   | Paternal                    |
| Pt 33 | 7.6                  |                   | 17.2                 |                   | Maternal                    |
| Pt 34 | 3.7                  |                   | 11.2                 |                   | NA                          |
| Pt 35 | 3.2                  |                   | 14.2                 |                   | Maternal                    |
| Pt 36 | 3.9                  |                   | 22.8                 |                   | NA                          |
| Pt 37 | 3.9                  |                   | 9.5                  |                   | NA                          |
| Pt 38 | 45.5                 |                   | 32.2                 |                   | Maternal                    |
| Pt 39 | 41.9                 | 40.4              | 21.5                 | 24.6              | Maternal                    |
| Pt 40 | 33.9                 |                   | 20.0                 |                   | NA                          |

Abbreviations: Meth, Methylation; NA, Not Available.
